# Supplementary material for: Identification of septicaemia causing bacteria in forest-based tropical tasar silkworm Antheraea mylitta D
Source: Research Square preprint supplement (doi:10.21203/rs.3.rs-3631387/v1), 2024-09-06
Supplement: Supplementary file 1 [file bf257f20f3b5390431893af9.docx]

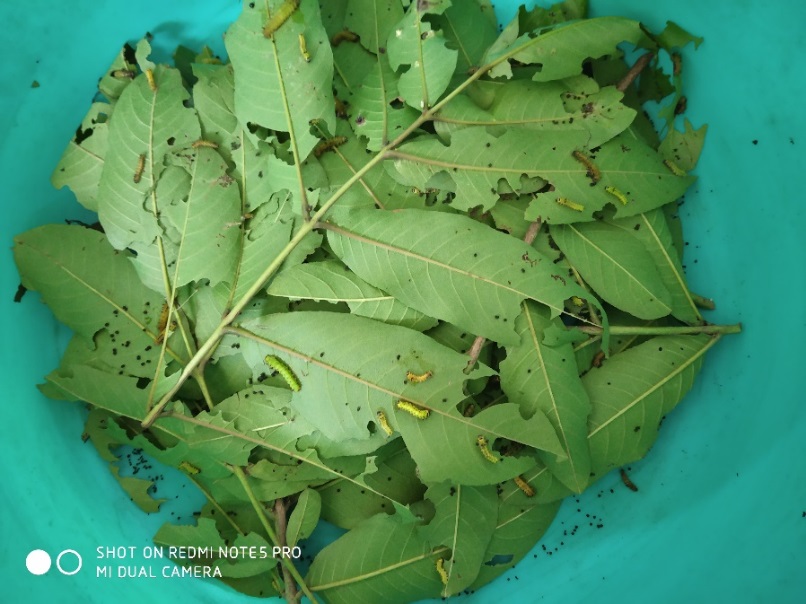
**Supplementary figures**

**(b)**


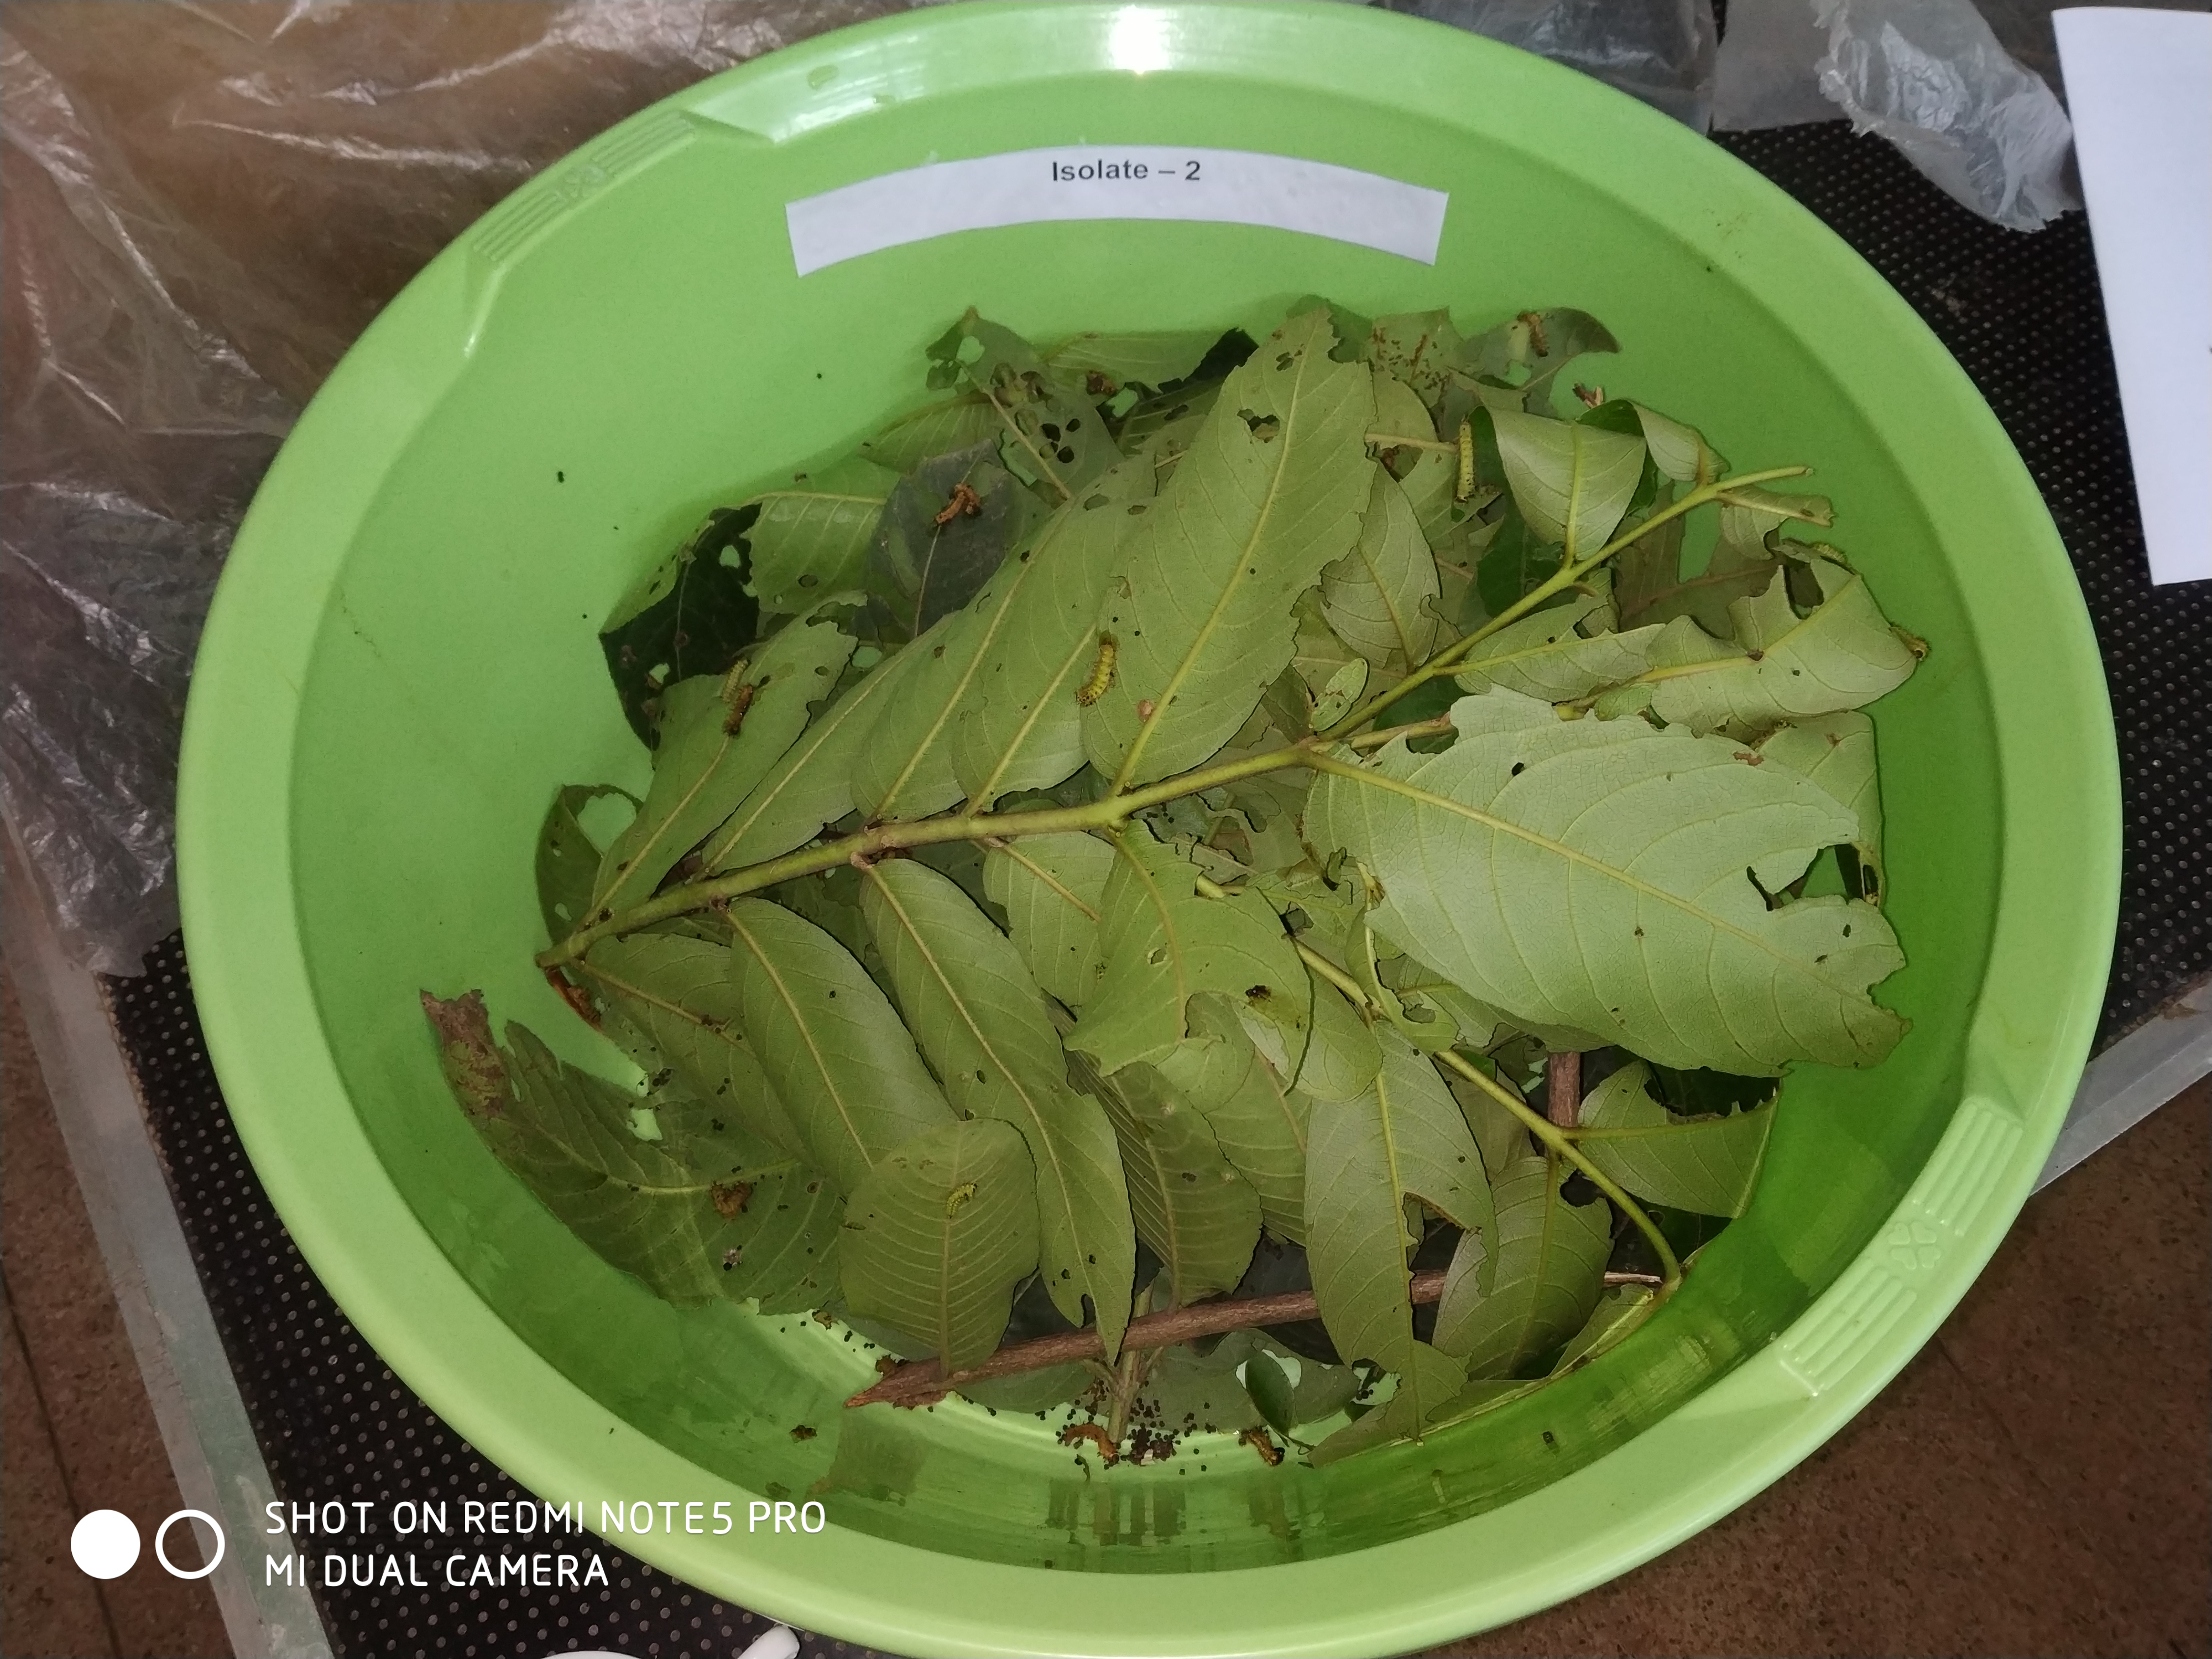


**(a)**

**Fig. S1** Pathogenicity test of SBP-1 strain on second instar tasar silkworm larva. Inoculated larvae were reared in plastic tub (a) silkworm have shown high mortality after 48 hours after inoculation (b).


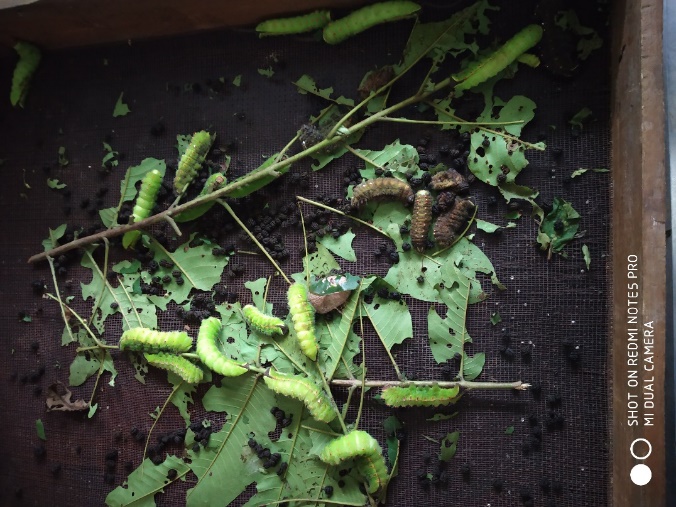


**Fig.S2 Pathogenicity test of SBP-1 strain on fourth instar tasar silkworm larva. SBP-1 caused less mortality in fourth instar larvae as compared to second instar.**


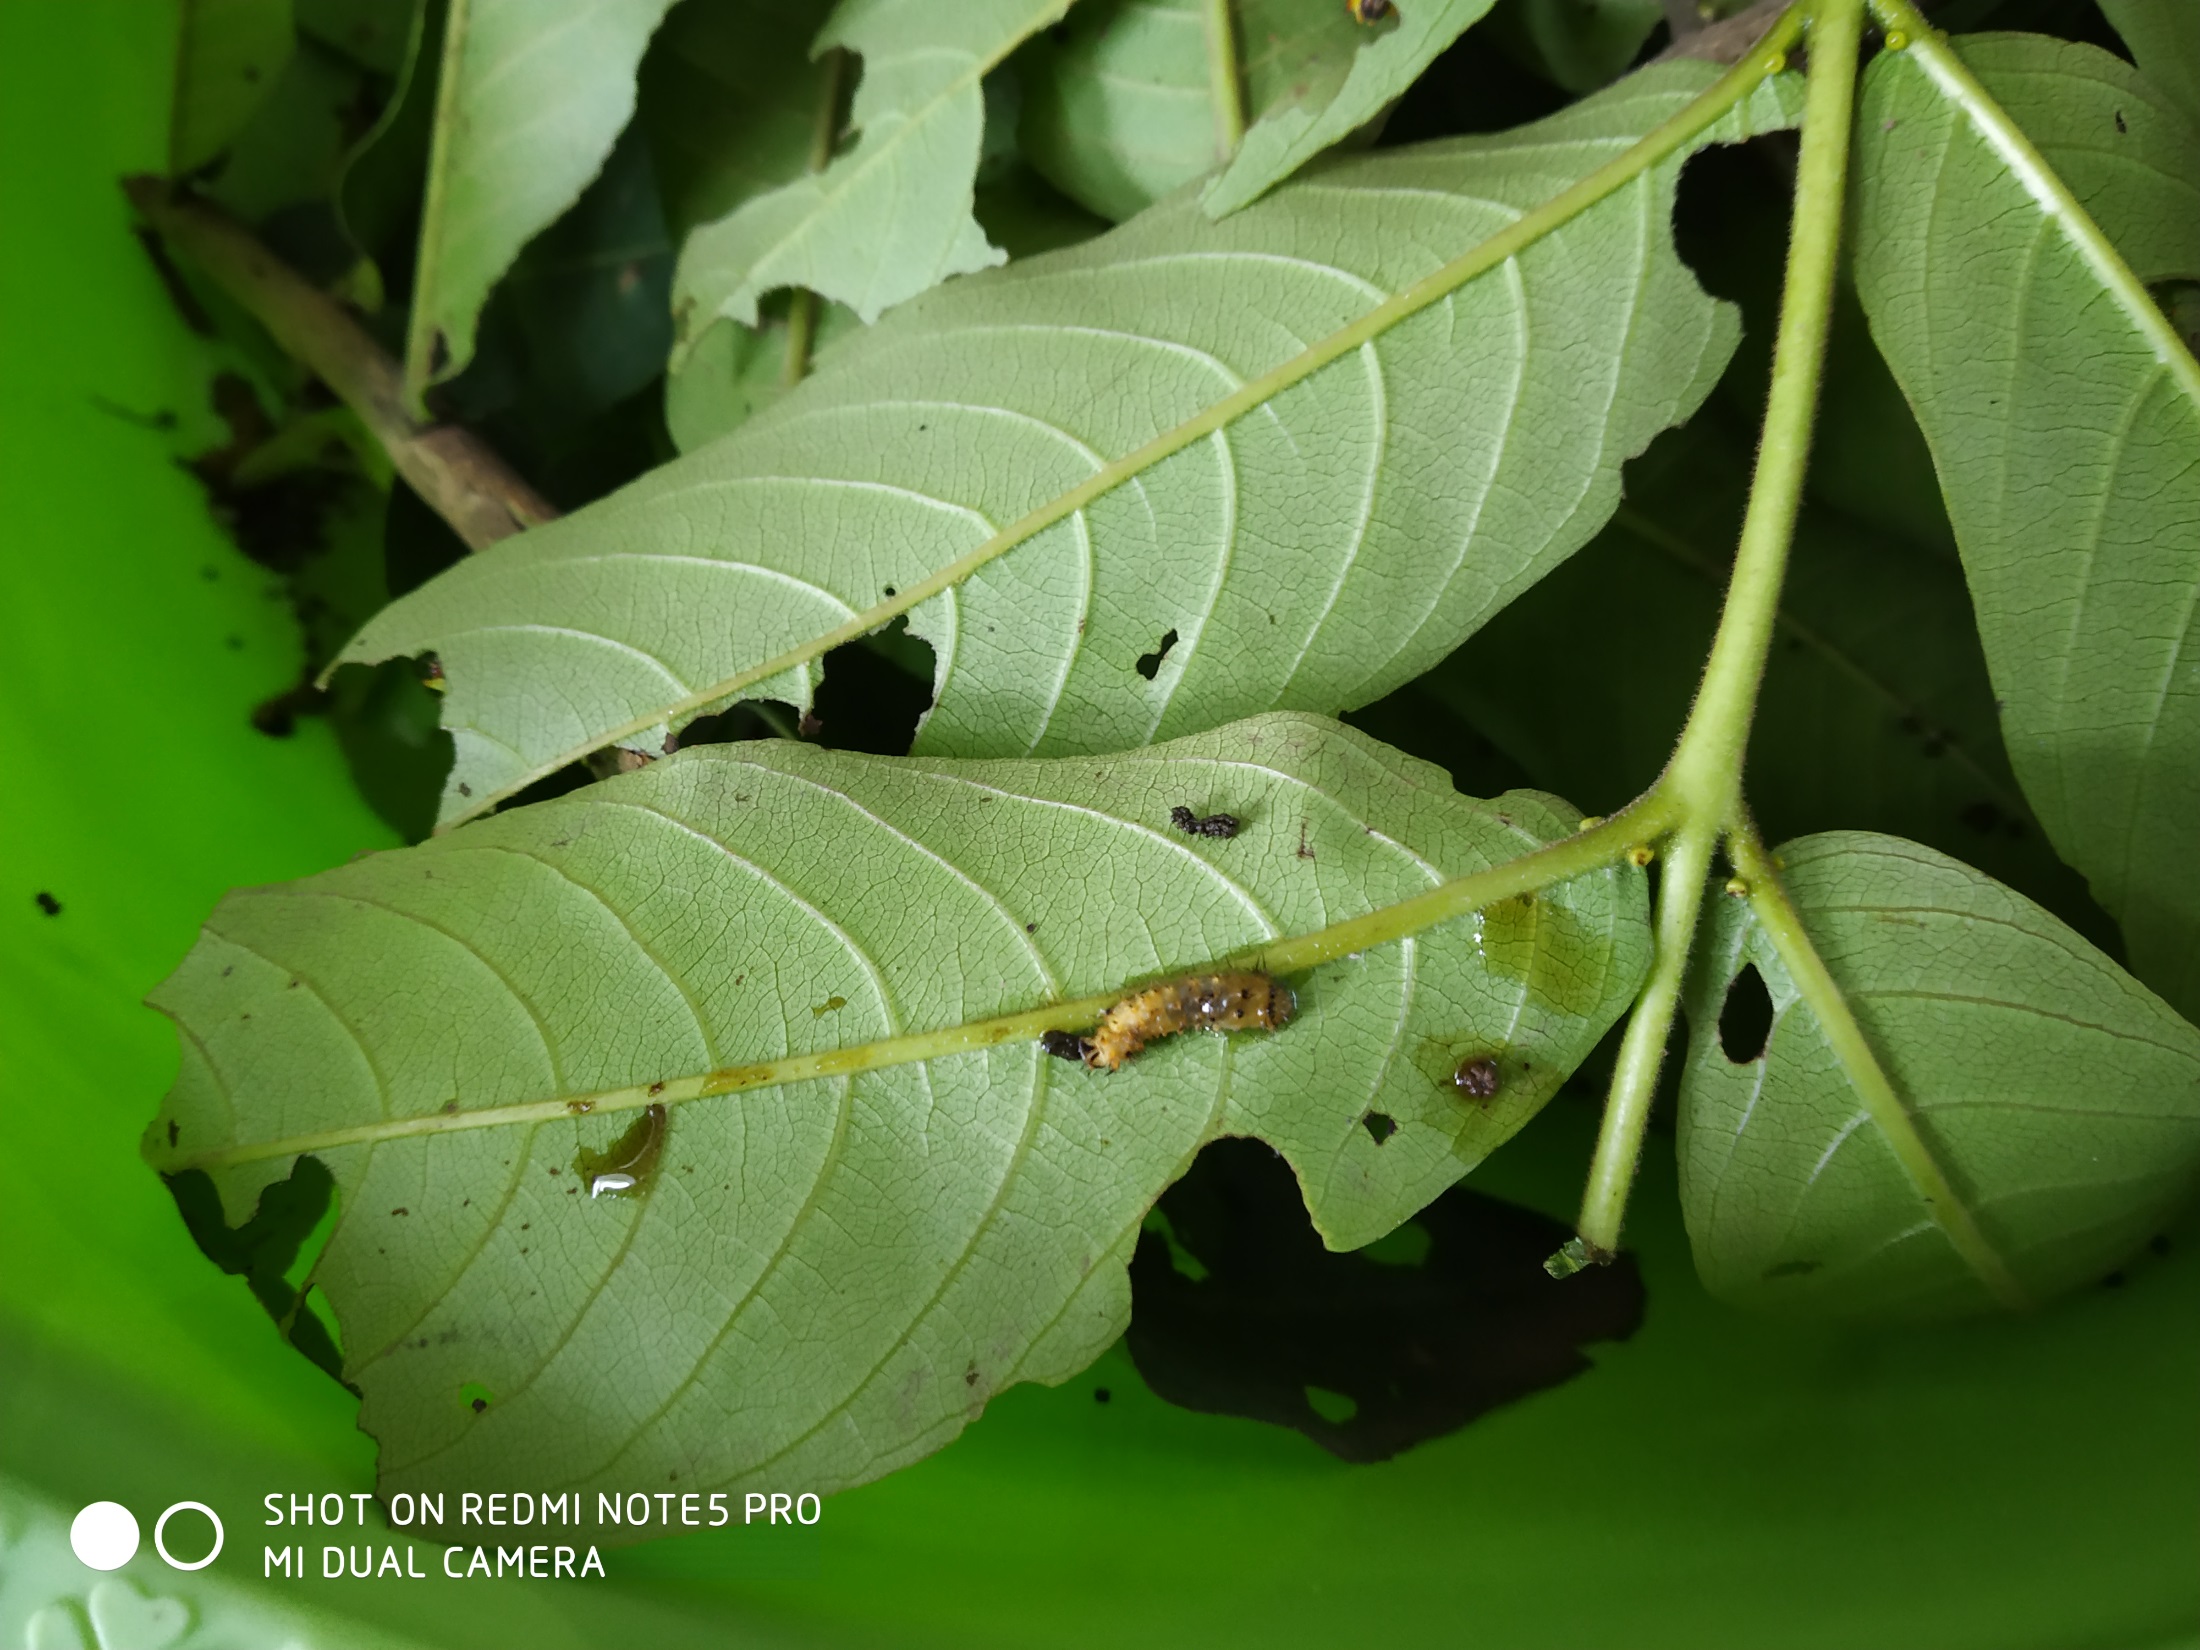

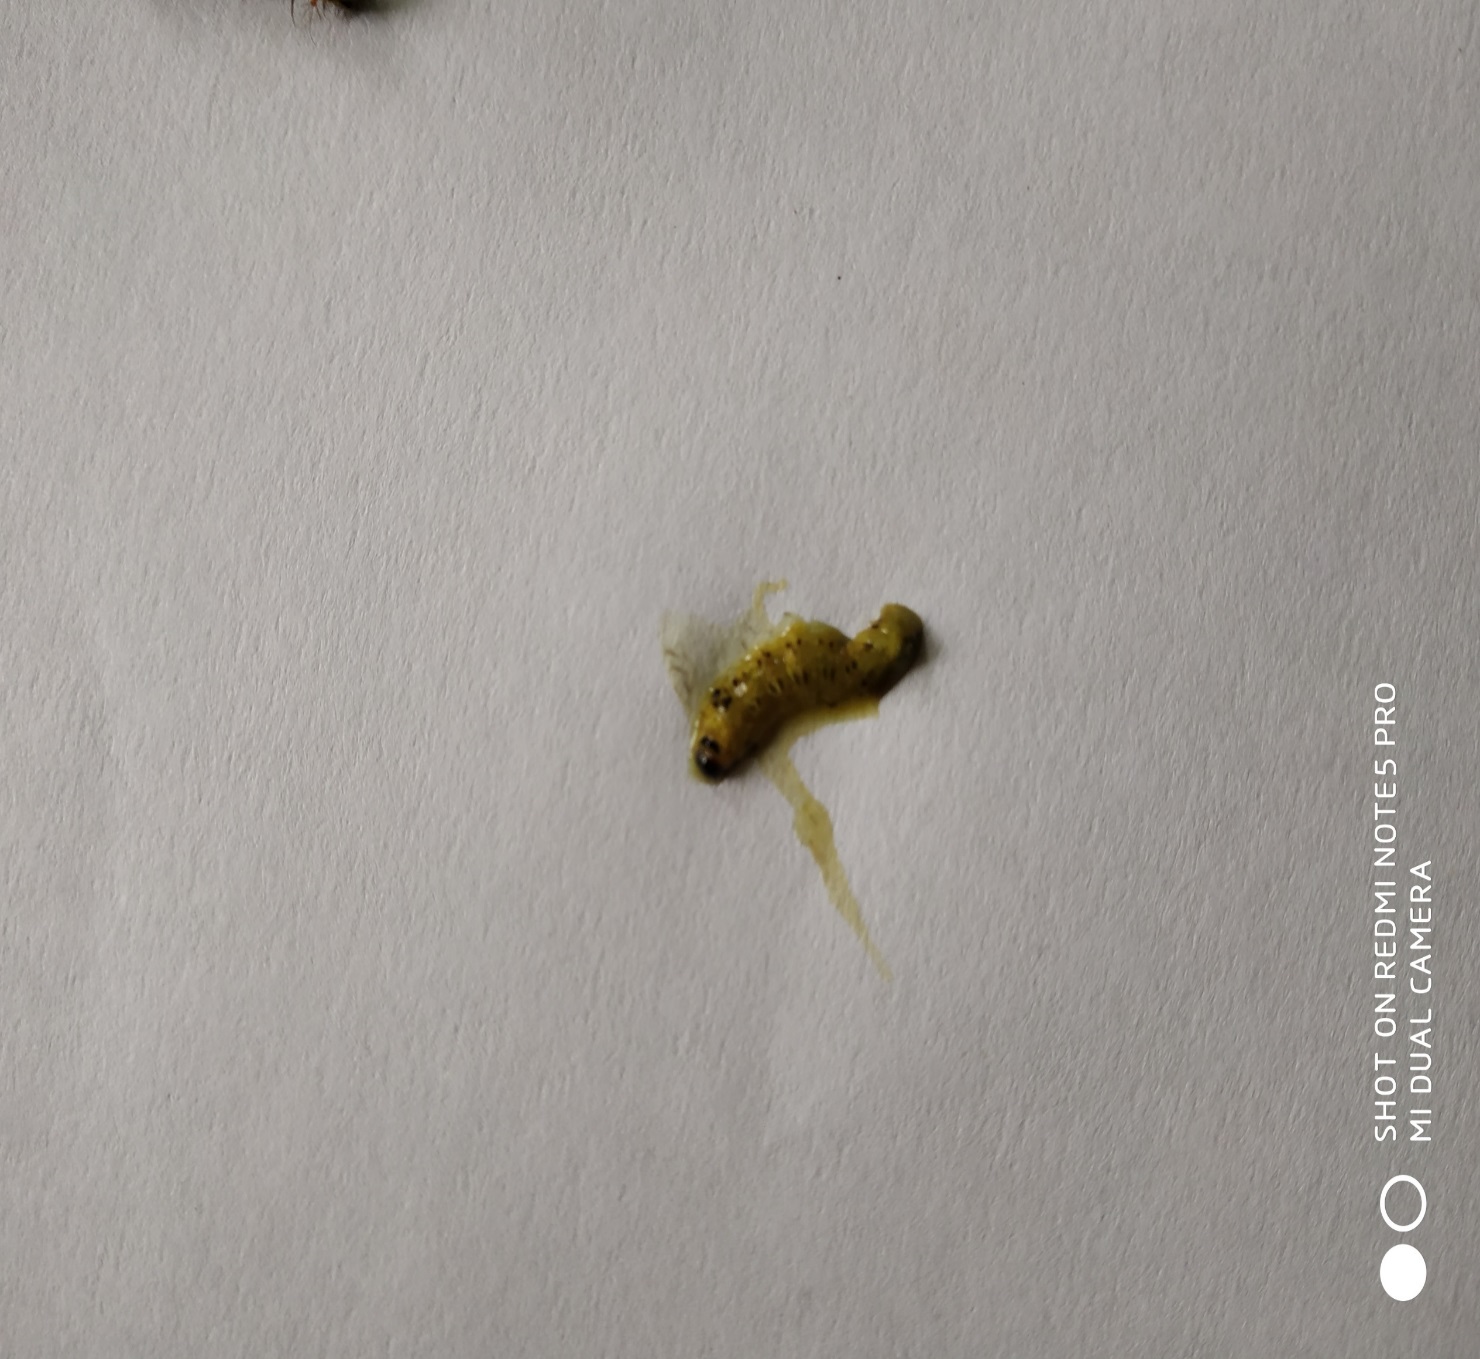

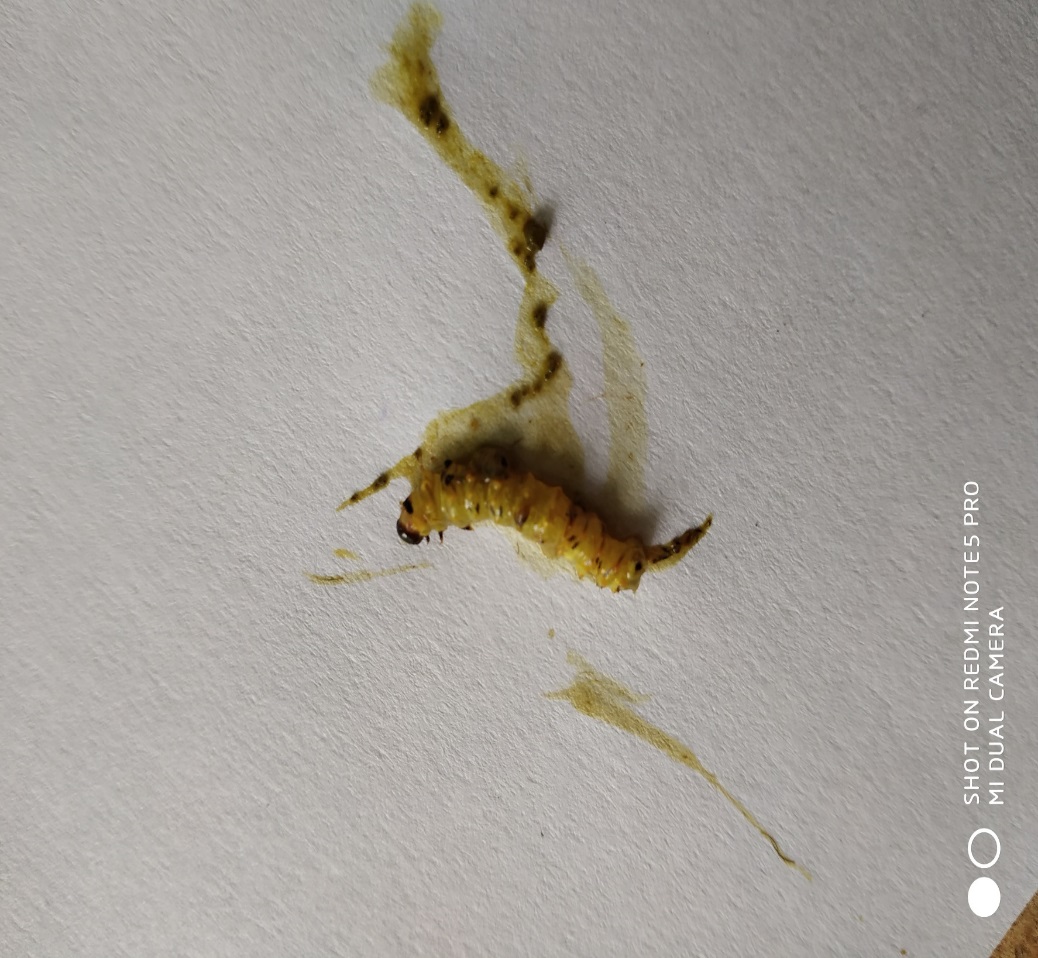

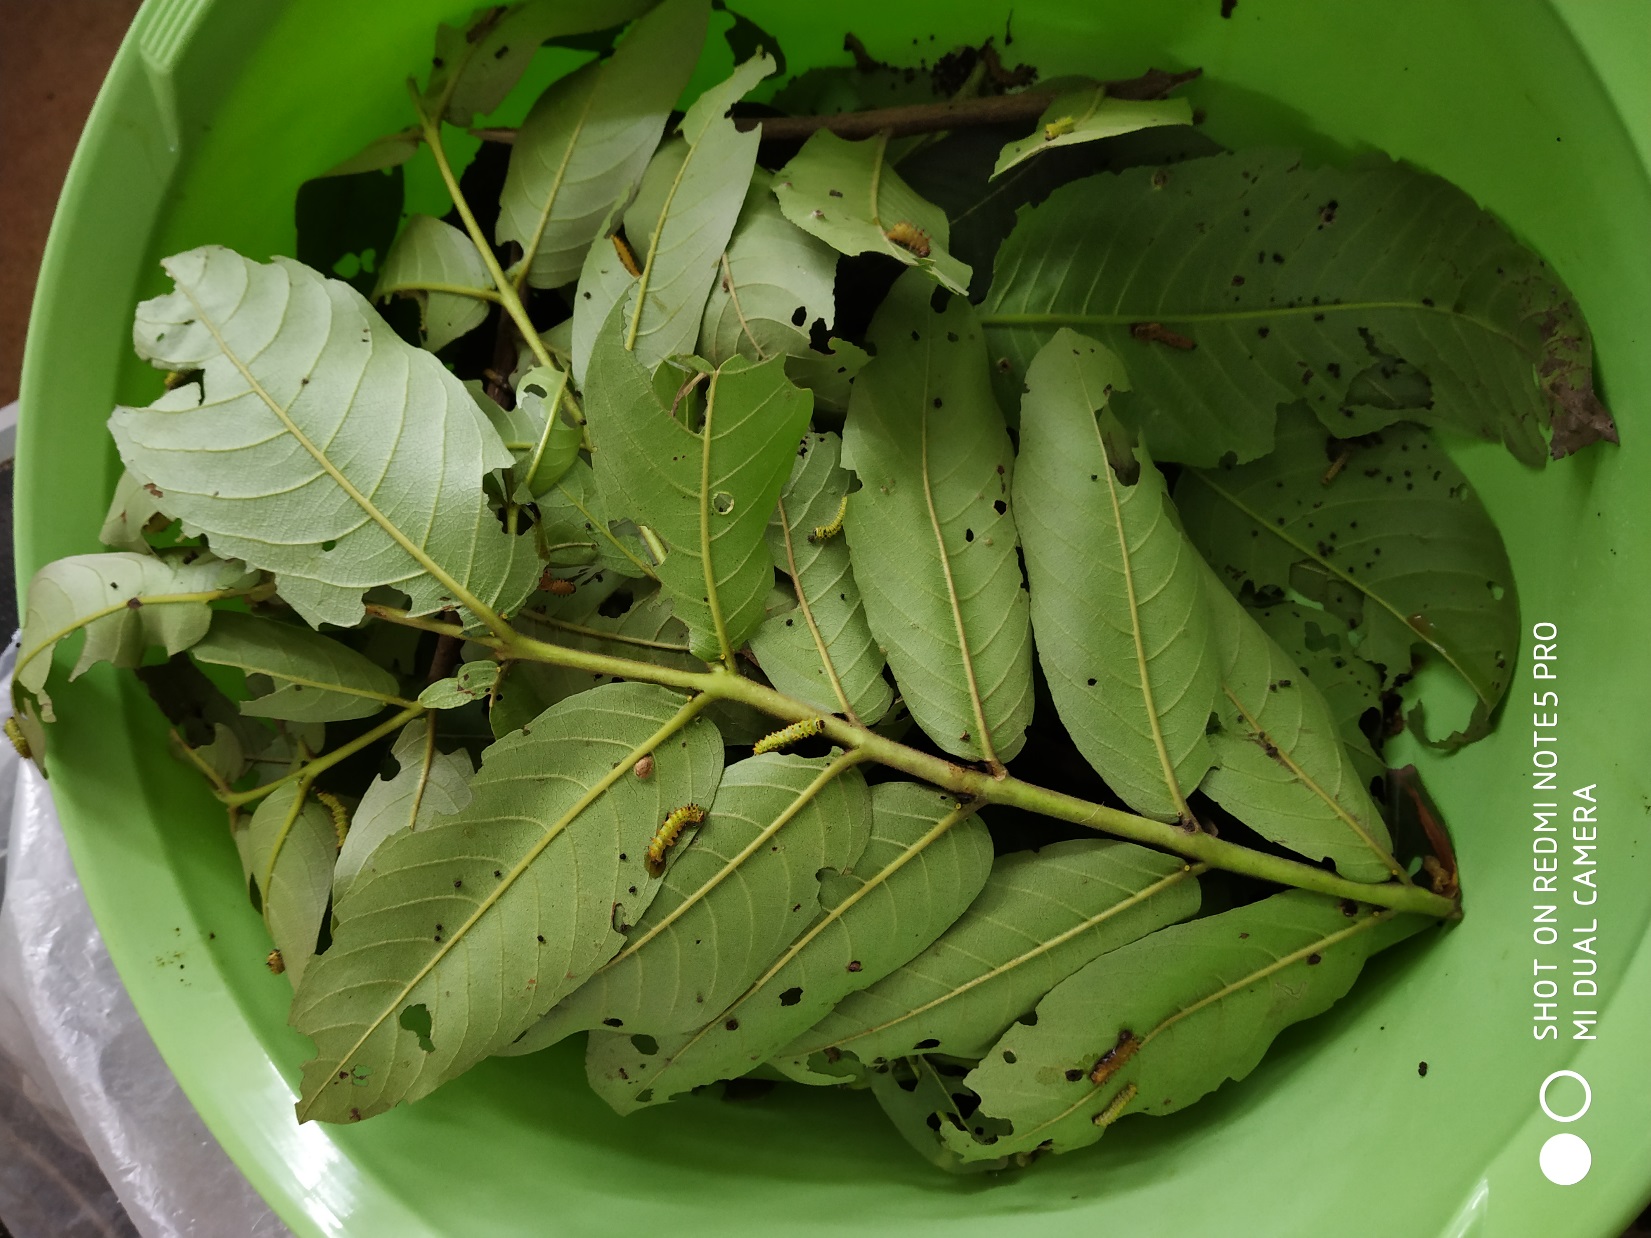


**(a)**

**(b)**

**(c)**

**(d)**

**Fig. S3: Symptoms of second instar tasar silkworm larva infected with bacterial pathogen.** 48 h after pathogen inoculation some larvae defecate liquid (a), body becomes shine and soft (b), sometime its body will rupture (c) body content will comes out (d).
